1 **Testosterone promotes Coxsackievirus B3 pathogenesis in an oral inoculation mouse model**

2

3 Adeeba H. Dhalech<sup>#</sup>, Caleb M. Corn<sup>#</sup>, Vrushali Mangale, and Christopher M. Robinson\*

4

5 Department of Microbiology and Immunology, Indiana University School of Medicine,  
6 Indianapolis, IN, 46202, USA.

7

8 <sup>#</sup>These authors contributed equally to this work.

9

10 \*To whom correspondence should be addressed.

11 Mailing address: 635 Barnhill Drive, Indianapolis, IN, 46202

12 Phone: 317-274-7822

13 Fax: 317-274-3331

14

15

16

17 Running Title: CVB3 fecal shedding and pathogenesis is enhanced by testosterone

18

19

20

21

22

23

24 **Abstract**

25 Enteroviruses initiate infection in the gastrointestinal tract, and sex is often a biological variable  
26 that impacts infection. The role of sex hormones on enterovirus pathogenesis, however, is  
27 unclear. Previous data indicate that sex hormones can influence intestinal replication of  
28 Coxsackievirus B3 (CVB3), an enterovirus in the Picornavirus family. To determine if  
29 testosterone promotes CVB3 infection, male mice were castrated and provided placebo or  
30 testosterone-filled capsules. We found that testosterone-treated mice shed significantly more  
31 CVB3 in the feces and succumbed to CVB3-induced disease at a higher rate than castrated mice  
32 given a placebo. Treatment of male mice with an androgen receptor antagonist, flutamide,  
33 protected male mice from CVB3-induced lethality, further confirming the role of testosterone in  
34 viral pathogenesis. We also observed higher viral loads in peripheral tissues of testosterone-  
35 treated mice and an increase in the cytokine and chemokine response. Finally, we found that  
36 testosterone treatment in female mice increased fecal CVB3 shedding but had no impact on viral  
37 lethality. Overall, these data indicate that testosterone and androgen receptor signaling can  
38 promote CVB3 replication in the intestine and enhance CVB3 lethality in a sex-dependent  
39 manner.

40

41

42

43

44

45

46

47 **Importance**

48 Biological sex plays a significant role in the outcome of various infections and diseases. The  
49 impact of sex hormones on intestinal replication and dissemination of Coxsackievirus B3  
50 remains limited. Using an oral inoculation model, we found that testosterone enhances CVB3  
51 shedding and lethality in male mice. Further, testosterone can promote CVB3 shedding in female  
52 mice. This work highlights the role of testosterone in intestinal replication of CVB3 and suggests  
53 that sex hormones can impact the replication of enteric viruses.

54

55

56

57

58

59

60

61

62

63

64

65

66

67

68

69

## 70 **Introduction**

71 Sex plays a significant role in human disease. Males are often more susceptible to pathogens,  
72 while females are more predisposed to autoimmune diseases (1-4). This disparity is linked to the  
73 immune system as sex hormones can significantly affect immune responses. Androgens, such as  
74 testosterone, can suppress immunity, delaying the elimination of pathogens (5-9). On the other  
75 hand, estrogens can enhance both the cell-mediated and humoral immune response, and there is  
76 evidence supporting estrogen's influence on disease severity in cardiovascular diseases and  
77 traumatic brain injuries (10-16). However, the mechanism and consequences of sex hormones on  
78 infectious diseases remain limited.

79

80 Coxsackievirus is a non-enveloped RNA virus in the *Picornaviridae* family and implicated in  
81 several human diseases, including viral myocarditis, HFMD, and meningitis (17-19). Infants,  
82 children, and immunocompromised individuals are the most susceptible to these diseases, and  
83 Coxsackievirus is associated with an 11% fatality rate in neonates (20-22). Coxsackievirus B3  
84 (CVB3) is one of the leading causes of viral myocarditis. There is a strong sex bias in viral  
85 myocarditis as it affects more males than females, with a mortality rate of 2:1 in individuals  
86 infected under the age of 40 (23, 24). Animal models of CVB3 have provided further evidence of  
87 this sex bias. Our laboratory, and others, have shown that sex hormones contribute to CVB3  
88 pathogenesis. Castration of male mice before infection reduces CVB3-induced myocarditis and  
89 mortality (25, 26). In CVB3-infected mice, dysregulation of the immune response is  
90 hypothesized to contribute to mortality. Testosterone and estradiol influence the CD4<sup>+</sup> T cell  
91 response to CVB3 to either promote or protect against viral-induced myocarditis (27-29).  
92 Castration of male mice also significantly reduces anti-inflammatory M2 macrophages resulting

93 in more severe myocarditis following CVB3 infection, suggesting other immune cells contribute  
94 to myocarditis (30). Finally, genes on the Y chromosome also likely contribute to CVB3-induced  
95 disease, indicating that viral myocarditis is multifactorial in males (31, 32). Therefore, many  
96 questions remain as to the mechanism of the sex bias in Coxsackievirus infections.

97

98 While animal models have provided vital information on CVB3 pathogenesis, many of these  
99 models mimic systemic infection through intraperitoneal injections of the virus. However,  
100 Coxsackievirus is a member of a group of viruses transmitted through the fecal-oral route,  
101 termed enteroviruses. Very few studies have shown successful oral inoculation of mice with  
102 Coxsackievirus (33-37). Recently we established an oral inoculation model to examine CVB3  
103 replication in the intestine. Using this model, we also observed a sex bias in infection. We found  
104 that male mice support robust intestinal replication and succumb to CVB3 induced disease.  
105 Female mice, however, are mainly resistant to CVB3 with limited viral replication in the  
106 intestine (38). Gonadectomy before CVB3 infection impacted fecal shedding in mice and  
107 protected male mice from CVB3-induced lethality, suggesting that sex hormones contribute to  
108 viral pathogenesis. Here, we show that testosterone enhances CVB3 shedding in male and female  
109 mice. Testosterone also enhanced lethality in male mice, but not in female mice. Overall, these  
110 data highlight the importance of examining sex bias in CVB3 induced disease.

111

## 112 **Results**

113 **Testosterone and androgen receptor signaling enhances CVB3 lethality in male mice**  
114 **following oral inoculation.** We have previously established an oral inoculation model for CVB3  
115 using C57BL/6 *Ifnar*<sup>-/-</sup> (deficient for that interferon  $\alpha/\beta$  receptor) mice (38). We found that

116 castration of male *Ifnar*<sup>-/-</sup> mice prior to oral infection with CVB3 protected against CVB3-  
117 induced lethality and significantly reduced CVB3 fecal shedding. To determine if testosterone,  
118 specifically, could impact CVB3 pathogenesis, we surgically castrated male *Ifnar*<sup>-/-</sup> mice to  
119 deplete endogenous testosterone. As a control, we also performed mock castrations on male  
120 mice. One week after surgery, we implanted mice with placebo or exogenous testosterone  
121 capsules. To assess hormone replacement, we determined serum concentrations of testosterone  
122 by ELISA. Castrated mice that received the placebo capsule had a significantly lower serum  
123 testosterone concentration than mock-castrated and castrated male mice that received  
124 testosterone (Fig. 1A). Further, mock castrated and castrated mice receiving exogenous  
125 testosterone had similar amounts of serum testosterone, confirming successful hormone  
126 treatment. One week following hormone treatment, male mice were orally inoculated with  $5 \times 10^7$   
127 PFU CVB3 and monitored for survival for 14 days post-inoculation (dpi). We found that, like  
128 our previous study (38), testosterone-depleted mice (castrated + placebo) were protected from  
129 CVB3-induced lethality (Fig 1B). Further, mock castrated mice and testosterone-treated  
130 (castrated + testosterone) mice were significantly more likely to die from CVB3 inoculation than  
131 testosterone-depleted mice. These data indicate that testosterone contributes to CVB3-induced  
132 lethality in male mice.

133

134 To confirm the effects of testosterone on male *Ifnar*<sup>-/-</sup> mice, we hypothesized that treatment with  
135 an androgen receptor antagonist, flutamide, would also confer similar protection against CVB3  
136 infection. To test this hypothesis, we administered flutamide (25 $\mu$ g/kg) by intraperitoneal  
137 injections to male *Ifnar*<sup>-/-</sup> mice prior to oral inoculation with CVB3 and monitored mice for  
138 survival for 14 dpi. We found that mice treated with flutamide were protected entirely from

139 CVB3-induced lethality compared to mice provided vehicle control injections (Fig. 1C). Taken  
140 together, these data indicate that testosterone and androgen receptor signaling in orally CVB3  
141 inoculated male *Ifnar<sup>-/-</sup>* mice is a significant contributor to viral-induced lethality.

142

### 143 **Testosterone promotes CVB3 fecal shedding and viral dissemination to peripheral tissues.**

144 CVB3 is spread through the fecal-oral route; therefore, we next examined CVB3 fecal shedding,  
145 indicative of viral replication in the intestine (38). Following oral inoculation, we collected feces  
146 at 1, 2, and 3 dpi and quantified fecal CVB3 using a plaque assay on HeLa cells. We found that  
147 at 2 and 3 dpi, testosterone-depleted mice shed significantly less CVB3 in the feces than mock-  
148 castrated male mice (Fig. 2A and 2B). Further, castrated mice receiving exogenous testosterone  
149 shed similar levels of CVB3 as compared to mock-castrated mice and significantly more CVB3  
150 than testosterone-depleted mice. Since we observed higher fecal shedding in mice with  
151 testosterone, we hypothesized that these mice with testosterone would also have higher viral  
152 titers in the peripheral tissues following oral inoculation. To examine this hypothesis, we  
153 harvested the heart, liver, kidney, spleen, and pancreas at three dpi and quantified CVB3 tissue  
154 titers by a plaque assay. Similar to fecal shedding, we observed higher tissue CVB3 titers for  
155 mock castrated and testosterone-treated mice than testosterone-depleted mice (Fig. 2C). Taken  
156 together, these data suggest that testosterone enhances fecal shedding and promotes viral  
157 dissemination of CVB3 to peripheral tissues following replication in the intestine.

158

159 **The inflammatory response to CVB3 is enhanced in mice with testosterone.** The immune  
160 response plays a pivotal role in tissue damage following CVB3 infection (27, 39-43). Previously,  
161 we observed a systemic immune response to CVB3 in male mice as measured by serum cytokine

162 and chemokine levels (38). To test whether testosterone altered the magnitude of the cytokine  
163 and chemokine response, we measured the serum concentrations of 32 cytokine and chemokines  
164 at 3 dpi. In mock castrated mice, we saw an overall increase in the serum concentrations of pro-  
165 inflammatory cytokines and chemokines IL-6, IFN- $\gamma$ , TNF- $\alpha$ , IP-10, MCP-1, and RANTES  
166 compared to uninfected males (Fig 3). The only cytokines and chemokines significantly altered  
167 by testosterone were KC and G-CSF, which were found in greater serum concentrations in mock  
168 castrated and testosterone-treated mice than uninfected mice. In contrast, testosterone-depleted  
169 mice had a decrease in serum cytokine and chemokine concentration levels consistent with lower  
170 levels of viral replication in the peripheral tissues. These data indicate that male *Ifnar*<sup>-/-</sup> mice  
171 with testosterone elicit a more robust immune response than testosterone-depleted mice  
172 following oral inoculation of CVB3.

173

174 **CVB3 does not induce liver damage or cause pancreatitis in *Ifnar*<sup>-/-</sup> mice following oral**  
175 **inoculation.** We found that CVB3 tissue titers were the highest in the liver and pancreas  
176 following CVB3 inoculation; therefore, we hypothesized that testosterone could enhance liver  
177 necrosis and/or pancreatitis in *Ifnar*<sup>-/-</sup> mice. First, to test this hypothesis, we examined alanine  
178 aminotransferase (ALT) and lipase levels in the serum by ELISA at 3 dpi to determine liver and  
179 pancreas damage, respectively. We observed no significant increase in ALT levels or lipase  
180 levels in the serum of mock or castrated male mice following oral inoculation (Fig. 4A and 4B).  
181 Next, we examined histological sections of the liver and the pancreas from male mice sacrificed  
182 at 3 dpi. Similar to ELISA results, we observed no evidence of hepatic necrosis or inflammation  
183 in the liver (Fig. 4C). Further, we did not observe a loss of acinar cells, beta cells, or



184 inflammation in the pancreas (Fig. 4D). These data indicate that CVB3-Nancy does not induce  
185 liver damage or pancreatitis after oral inoculation of *Ifnar*<sup>-/-</sup> mice.

186

187 **Testosterone does not enhance CVB3-induced lethality in female mice but does enhance**

188 **fecal shedding and viral dissemination.** Previously we found that orally CVB3 inoculated

189 female *Ifnar*<sup>-/-</sup> mice were protected entirely from CVB3-induced lethality and had limited viral

190 fecal shedding (38). Since exogenous testosterone treatment restored fecal shedding and lethality

191 in male mice, we hypothesized that testosterone might enhance pathogenesis in female mice. To

192 examine this hypothesis, we provided exogenous testosterone or placebo capsules to female mice

193 before oral inoculation with CVB3. Like our castration studies, female mice with testosterone

194 had significantly higher serum testosterone concentrations than placebo controls (Fig. 5A). One

195 week after hormone treatment, female mice were orally inoculated with  $5 \times 10^7$  PFUs of CVB3

196 and monitored for survival. In contrast to males, both testosterone- and placebo-treated infected

197 females were protected from CVB3-induced lethality (Fig. 5B). Next, to examine fecal CVB3

198 shedding, feces were collected from infected mice at 1, 2, and 3 dpi, processed, and quantified by

199 a standard plaque assay. We observed significantly more CVB3 in the feces at 3 dpi in female

200 mice that received testosterone than female mice that received placebo capsules (Fig. 5C).

201 Finally, we examined CVB3 titers in peripheral tissues at 3 dpi to test if testosterone enhanced

202 viral dissemination. We found a significant increase in the viral loads of the heart, kidney, and

203 spleen in testosterone-treated female mice (Fig. 5D). The viral load in the liver was higher in

204 testosterone-treated mice but did not reach statistical significance. In contrast to the other organs,

205 the viral load in the pancreas was similar between placebo- and testosterone-treated female mice.

206 Overall, these data indicate that testosterone can enhance fecal CVB3 shedding and viral

207 dissemination to the heart, kidney, and spleen; however, testosterone does not contribute to  
208 CVB3-induced lethality in female mice.

209

## 210 **Discussion**

211 Sexual dimorphism is commonly observed in various infectious, autoimmune, and  
212 cardiovascular diseases. Males are often more susceptible to diseases caused by bacteria, viruses,  
213 fungi, or parasites. Females, however, are more predisposed to autoimmune diseases like  
214 systemic lupus erythematosus, multiple sclerosis, and rheumatoid arthritis. Additionally, clinical  
215 and epidemiological studies have highlighted the disparity in cardiovascular diseases with an  
216 increased mortality rate in men. CVB3 also displays a sex bias in human infections where males  
217 are twice as likely to have severe sequelae. Previously, we observed a sex bias in CVB3 orally  
218 inoculated male and female *Ifnar*<sup>-/-</sup> mice, consistent with human infections (38). Here we show  
219 that testosterone, the primary sex hormone in males, impacts CVB3 pathogenesis following oral  
220 infection.

221

222 Our data indicate that testosterone enhances intestinal replication of CVB3. We observed that  
223 testosterone could promote fecal shedding of CVB3 in both male and female *Ifnar*<sup>-/-</sup> mice (Figs.  
224 2A and 5C). To our knowledge, this is the first time that testosterone has been demonstrated to  
225 influence the intestinal replication of an enteric virus. These data differ from previous studies  
226 using systemic models of CVB3 infection. In this model, castration of wild-type, immune-  
227 competent male mice did not impact viral replication in the heart (30). This difference may be  
228 due to a sex bias in organ-specific replication of CVB3 and dependent on the type I IFN  
229 response. In agreement, we have previously shown that while CVB3 replicates better in the

230 intestine of wild-type male mice, CVB3 replicated equally in the organs of wild-type male and  
231 female mice following systemic infection. Further, the loss of type 1 IFN also facilitates sex-  
232 dependent replication in the liver and spleen (38). Overall, these data suggest that organ-specific  
233 androgen signaling may play a significant role in CVB3 replication.

234

235 Unfortunately, the mechanism for the sex hormone modulation of intestinal replication is  
236 unclear. Previous data indicate that sex hormones, including testosterone, can enhance CVB3  
237 attachment to cardiomyocytes (26); therefore, testosterone may alter the expression of viral  
238 receptors on intestinal cells. Additionally, testosterone can interact with immune cells and  
239 suppress inflammation (30, 44-47). It is possible that testosterone dampens the innate immune  
240 response in the intestine, promoting initial viral replication in the intestine. Our data indicate that  
241 the loss of testosterone broadly reduces the systemic cytokine and chemokine response to CVB3  
242 (Fig. 3). However, it is unclear if this reduction is due to loss of testosterone or limited CVB3  
243 replication and dissemination. Whether testosterone influences CVB3 binding to intestinal  
244 epithelial cells or alters the intestinal immune response during initial viral replication warrants  
245 further study.

246

247 Recent data also show that intestinal bacteria can influence the intestinal replication of enteric  
248 viruses, including CVB3 (48-50). We have recently demonstrated that specific intestinal bacteria  
249 in male mice play a role in promoting CVB3 infectivity and viral stability (51). While the  
250 mechanism is unclear for CVB3, a similar enterovirus, poliovirus, has been found to use bacteria  
251 to enhance attachment to the poliovirus receptor (49, 52). Interestingly, sex-specific differences  
252 in intestinal bacteria can account for the sex bias in mouse models of type-1 diabetes (53, 54).

253 Since bacteria can also metabolize hormones that alter bacterial growth (55), it is intriguing to  
254 speculate that sex hormones may change the overall intestinal ecosystem to directly or indirectly  
255 impact CVB3 replication.

256

257 With a systemic infection model of CVB3, previous studies have found that testosterone  
258 enhances lethality in male mice (25), consistent with our data. Castrating male mice, or by using  
259 flutamide, an androgen receptor antagonist, we were also able to rescue mice from CVB3-  
260 induced lethality (Fig. 1B and 1C). Interestingly, testosterone increased CVB3 shedding and  
261 viral dissemination in female mice in our model, but testosterone did not enhance lethality (Fig.  
262 5). In agreement with our data, systemic models of CVB3 in infection have shown that while  
263 testosterone treatment promoted cardiac inflammation in female mice following CVB3 infection,  
264 testosterone did not increase mortality in female mice (25, 27). These data suggest that other sex-  
265 dependent factors may play a role in clearing the viral infection in female mice. Previous studies  
266 have shown that the Y chromosome contributes to CVB3 pathogenesis (31, 32); therefore, genes  
267 on the sex chromosomes may represent one of these critical factors. Future studies are required  
268 to identify Y-specific genes and other potential correlates of immune protection that may  
269 promote or limit CVB3 pathogenesis in mice.

270

271 The cause of death in our oral inoculation model remains unknown. CVB3 is the primary cause  
272 of viral myocarditis. However, in C57BL/6 mice, CVB3 also causes hepatic damage and  
273 pancreatitis (56-59). Since we observed high viral loads in the liver and pancreas of testosterone-  
274 treated animals (Fig 2C), we hypothesized that the male mice died of hepatitis or pancreatitis.  
275 However, contrary to our hypothesis, we did not observe inflammation or tissue damage in the

276 liver or pancreas following infection (Fig 4C and 4D). We confirmed these histology data by  
277 serum ALT and Lipase concentrations at 3 dpi (Fig 4A and 4B). The cause of death is still under  
278 investigation; however, enteric viruses, including poliovirus and Coxsackievirus, can cross the  
279 blood-brain barrier, infect the central nervous system, and cause viral meningitis and encephalitis  
280 (60, 61). Further studies are required to determine viral loads in the central nervous system and  
281 resolve the determinants of lethality in the oral inoculation model.

282

283 In conclusion, we found that testosterone promotes intestinal CVB3 replication in orally  
284 inoculated male and female *Ifnar<sup>-/-</sup>* mice. Further, testosterone enhances viral-induced lethality in  
285 a sex-dependent manner. The exact mechanism of how testosterone aggravates disease is  
286 unclear, but future studies will be necessary to determine how this sex hormone promotes  
287 intestinal CVB3 infection. Overall, these data reinforce the importance of sex as a biological  
288 variable in enteric viral infections.

289

290

291

292

293

294

295

296

297

298

## 299 **Materials and Methods**

300

### 301 *Cells and virus*

302 HeLa cells were grown in Dulbecco's modified Eagle's medium (DMEM) supplemented with  
303 10% calf serum and 1% penicillin-streptomycin at 37°C with 5% CO<sub>2</sub>. The CVB3-Nancy  
304 infectious clone was obtained from Marco Vignuzzi (Pasteur Institute, Paris, France) and  
305 propagated in HeLa cells as described previously (38). CVB3 was quantified by a standard  
306 plaque assay using HeLa cells.

307

### 308 *Mouse experiments*

309 All animals were handled according to the Guide for the Care of Laboratory Animals of the  
310 National Institutes of Health. All mouse studies were performed at Indiana University School of  
311 Medicine using protocols approved by the local Institutional Animal Care and Use Committee in  
312 a manner designated to minimize pain, and any animals that exhibited severe disease were  
313 euthanized immediately by CO<sub>2</sub> inhalation. C57BL/6 *PVR*<sup>+/+</sup> *Ifnar*<sup>-/-</sup> mice were obtained from S.  
314 Koike (Tokyo, Japan) (62). One week post hormone treatment, mice were orally infected with  
315 5x10<sup>7</sup> PFU of CVB3 IC Nancy. All adult experimental mice were 10-15 weeks old at the time  
316 of infection. Feces from infected mice were collected 1, 2, and 3 days post-infection, processed  
317 as previously described, and the fecal virus was quantified by a standard plaque assay (38).

318

### 319 *Castration and hormone manipulation*

320 Eight-week to ten-week-old male mice were put under anesthesia, and their testes were  
321 surgically removed or mock castrated as a surgical control. Testosterone implants were

322 constructed using silastic tubing (inner diameter-.078", outer diameter-.125"; Dow Chemical  
323 Company). After placing 7.5mm of Crystalline Testosterone (Sigma Aldrich) in the tubing, the  
324 ends of the tubing were sealed with 2.5 mm of medical adhesive (732 Multi-Purpose Sealant,  
325 Dowsil). After the medical adhesive dried, the implants were incubated at 37°C overnight in  
326 sterile phosphate-buffered saline. To ensure osmoregulation, implants that were found floating  
327 were discarded. Due to the light sensitivity of sex steroid hormones, the testosterone implants  
328 were concealed from light. One-week post castration, castrated mice were administered either  
329 testosterone or placebo capsules subcutaneously under the right shoulder. Mock-castrated mice  
330 were given placebo capsules. Testosterone levels of mouse serum were quantified using a  
331 rat/mouse testosterone ELISA following the manufacturer's instructions (MP Biomedical).  
332 Flutamide (TCI America, Portland, OR) was dissolved in 100% DMSO and diluted in double-  
333 distilled water. As a vehicle control, 100% DMSO was also diluted in double-distilled water  
334 before administration. Male mice were given 25µg/kg of flutamide or vehicle control by  
335 intraperitoneal injection for three consecutive days before oral inoculation with CVB3-Nancy.

336

### 337 ***Tissue collection and histological analysis***

338 The heart, liver, spleen, kidneys, and pancreas were aseptically collected 3 days post-infection  
339 and homogenized in phosphate-buffered saline using 0.9-2.0 mm stainless steel beads in a Bullet  
340 Blender (Next Advance). Cellular debris was removed by centrifugation at 12,000xg for 10 min  
341 at 4°C, supernatants were collected, and CVB3 was quantified by plaque assay on HeLa cells.  
342 Additionally, a portion of the aseptically removed organs were cut, washed in 1XPBS, put in  
343 histology cassettes, and fixed overnight using 10% Neutral buffered formalin (NBF). The

344 samples were transferred to 70% Ethanol. The tissues were then paraffin-embedded, sectioned,  
345 and stained with hematoxylin and eosin (H&E) by the Indiana University Histology Core.

346

### 347 *Serum collection and analysis*

348 Blood was collected from the inferior vena cava from infected or uninfected male and female  
349 mice 3 days post-infection and incubated at room temperature for 30 mins to initiate coagulation.

350 Samples were centrifuged at 2000 rpm for 15 mins, and separated serum was collected and

351 stored at -20 C for downstream analysis. Alanine transaminase (EN0207Mu-1, CusaBio

352 Technologies) and Pancreatic lipase (E91453Mu-1, Cusabio Technologies) were measured by

353 ELISA. Serum cytokine levels were measured by the Indiana University Multiplex Analysis

354 Core using a Millipore Milliplex MAP Mouse Cytokine/Chemokine Magnetic Kit (Millipore

355 Sigma, Burlington, MA).

356

### 357 *Statistical Analysis*

358 Comparisons between control and study groups were analyzed using either a Mann-Whitney U

359 test or a one-way analysis of variance (ANOVA). A Log-rank test was used for survival curve

360 analysis. Error bars in the figures represent the standard errors of the means. A p-value <0.05

361 was considered significant. All analyses were performed using GraphPad Prism 9 (GraphPad

362 Software, La Jolla, CA).

363

### 364 **Acknowledgments**

365 We would like to thank Samantha Scholz, DVM and Keely Szilagyi, DVM for their help and

366 input with the mouse castration and testosterone experiments. This work is funded by a K01



367 DK110216, R03 DK124749, a Showalter Trust Award, and a Biomedical Research Grant from  
368 the Indiana Clinical and Translational Sciences Institute to CMR.

369

370

371

372

373

374

375

376

377

378

379

380

381

382

383

384

385

386

387

388

389

## 390 References

- 391 1. Fuller AC, Kang B, Kang HK, Yahikozowa H, Dal Canto MC, Kim BS. 2005. Gender bias in  
392 Theiler's virus-induced demyelinating disease correlates with the level of antiviral  
393 immune responses. *J Immunol* 175:3955-63.
- 394 2. Shah VA, Chong CY, Chan KP, Ng W, Ling AE. 2003. Clinical characteristics of an outbreak  
395 of hand, foot and mouth disease in Singapore. *Ann Acad Med Singapore* 32:381-7.
- 396 3. Aminu M, Ahmad AA, Umoh JU, de Beer MC, Esona MD, Steele AD. 2007. Adenovirus  
397 infection in children with diarrhea disease in Northwestern Nigeria. *Ann Afr Med* 6:168-  
398 73.
- 399 4. Curiel RE, Miller MH, Ishikawa R, Thomas DC, Bigley NJ. 1993. Does the gender  
400 difference in interferon production seen in picornavirus-infected spleen cell cultures  
401 from ICR Swiss mice have any in vivo significance? *J Interferon Res* 13:387-95.
- 402 5. Hou J, Zheng WF. 1988. Effect of sex hormones on NK and ADCC activity of mice. *Int J*  
403 *Immunopharmacol* 10:15-22.
- 404 6. Rettew JA, Huet-Hudson YM, Marriott I. 2008. Testosterone reduces macrophage  
405 expression in the mouse of toll-like receptor 4, a trigger for inflammation and innate  
406 immunity. *Biol Reprod* 78:432-7.
- 407 7. McKay LI, Cidlowski JA. 1999. Molecular control of immune/inflammatory responses:  
408 interactions between nuclear factor-kappa B and steroid receptor-signaling pathways.  
409 *Endocr Rev* 20:435-59.
- 410 8. Furman D, Hejblum BP, Simon N, Jojic V, Dekker CL, Thiebaut R, Tibshirani RJ, Davis MM.  
411 2014. Systems analysis of sex differences reveals an immunosuppressive role for  
412 testosterone in the response to influenza vaccination. *Proc Natl Acad Sci U S A* 111:869-  
413 74.
- 414 9. Trigunaite A, Dimo J, Jorgensen TN. 2015. Suppressive effects of androgens on the  
415 immune system. *Cell Immunol* 294:87-94.
- 416 10. Brotfain E, Gruenbaum SE, Boyko M, Kutz R, Zlotnik A, Klein M. 2016. Neuroprotection  
417 by Estrogen and Progesterone in Traumatic Brain Injury and Spinal Cord Injury. *Curr*  
418 *Neuropharmacol* 14:641-53.
- 419 11. Salem ML, Hossain MS, Nomoto K. 2000. Mediation of the immunomodulatory effect of  
420 beta-estradiol on inflammatory responses by inhibition of recruitment and activation of  
421 inflammatory cells and their gene expression of TNF-alpha and IFN-gamma. *Int Arch*  
422 *Allergy Immunol* 121:235-45.
- 423 12. Straub RH. 2007. The complex role of estrogens in inflammation. *Endocr Rev* 28:521-74.
- 424 13. Sorachi K, Kumagai S, Sugita M, Yodoi J, Imura H. 1993. Enhancing effect of 17 beta-  
425 estradiol on human NK cell activity. *Immunol Lett* 36:31-5.
- 426 14. Zhou N, Yue Y, Xiong S. 2018. Sex Hormone Contributes to Sexually Dimorphic  
427 Susceptibility in CVB3-Induced Viral Myocarditis via Modulating IFN-gamma(+) NK Cell  
428 Production. *Can J Cardiol* 34:492-501.
- 429 15. Chakrabarti S, Lekontseva O, Davidge ST. 2008. Estrogen is a modulator of vascular  
430 inflammation. *IUBMB Life* 60:376-82.
- 431 16. Murphy E. 2011. Estrogen signaling and cardiovascular disease. *Circ Res* 109:687-96.

- 432 17. Kosrirukvongs P, Kanyok R, Sitritantikorn S, Wasi C. 1996. Acute hemorrhagic  
433 conjunctivitis outbreak in Thailand, 1992. *Southeast Asian J Trop Med Public Health*  
434 27:244-9.
- 435 18. He SJ, Han JF, Ding XX, Wang YD, Qin CF. 2013. Characterization of enterovirus 71 and  
436 coxsackievirus A16 isolated in hand, foot, and mouth disease patients in Guangdong,  
437 2010. *Int J Infect Dis* 17:e1025-30.
- 438 19. Andreoletti L, Leveque N, Boulagnon C, Brasselet C, Fornes P. 2009. Viral causes of  
439 human myocarditis. *Arch Cardiovasc Dis* 102:559-68.
- 440 20. Khetsuriani N, Lamonte A, Oberste MS, Pallansch M. 2006. Neonatal enterovirus  
441 infections reported to the national enterovirus surveillance system in the United States,  
442 1983-2003. *Pediatr Infect Dis J* 25:889-93.
- 443 21. Khetsuriani N, Lamonte-Fowlkes A, Oberst S, Pallansch MA, Centers for Disease C,  
444 Prevention. 2006. Enterovirus surveillance--United States, 1970-2005. *MMWR Surveill*  
445 *Summ* 55:1-20.
- 446 22. Abedi GR, Watson JT, Nix WA, Oberste MS, Gerber SI. 2018. Enterovirus and  
447 Parechovirus Surveillance - United States, 2014-2016. *MMWR Morb Mortal Wkly Rep*  
448 67:515-518.
- 449 23. Fairweather D, Cooper LT, Jr., Blauwet LA. 2013. Sex and gender differences in  
450 myocarditis and dilated cardiomyopathy. *Curr Probl Cardiol* 38:7-46.
- 451 24. Woodruff JF. 1980. Viral myocarditis. A review. *Am J Pathol* 101:425-84.
- 452 25. Huber SA, Job LP, Auld KR. 1982. Influence of sex hormones on Coxsackie B-3 virus  
453 infection in Balb/c mice. *Cell Immunol* 67:173-9.
- 454 26. Lyden DC, Olszewski J, Feran M, Job LP, Huber SA. 1987. Coxsackievirus B-3-induced  
455 myocarditis. Effect of sex steroids on viremia and infectivity of cardiocytes. *Am J Pathol*  
456 126:432-8.
- 457 27. Huber SA, Kupperman J, Newell MK. 1999. Hormonal regulation of CD4(+) T-cell  
458 responses in Coxsackievirus B3-induced myocarditis in mice. *J Virol* 73:4689-95.
- 459 28. Huber SA. 2008. Coxsackievirus B3-induced myocarditis: infection of females during the  
460 estrus phase of the ovarian cycle leads to activation of T regulatory cells. *Virology*  
461 378:292-8.
- 462 29. Huber SA, Pfaeffle B. 1994. Differential Th1 and Th2 cell responses in male and female  
463 BALB/c mice infected with coxsackievirus group B type 3. *J Virol* 68:5126-32.
- 464 30. Frisancho-Kiss S, Coronado MJ, Frisancho JA, Lau VM, Rose NR, Klein SL, Fairweather D.  
465 2009. Gonadectomy of male BALB/c mice increases Tim-3(+) alternatively activated M2  
466 macrophages, Tim-3(+) T cells, Th2 cells and Treg in the heart during acute  
467 coxsackievirus-induced myocarditis. *Brain Behav Immun* 23:649-57.
- 468 31. Robinson DP, Huber SA, Moussawi M, Roberts B, Teuscher C, Watkins R, Arnold AP, Klein  
469 SL. 2011. Sex chromosome complement contributes to sex differences in coxsackievirus  
470 B3 but not influenza A virus pathogenesis. *Biol Sex Differ* 2:8.
- 471 32. Case LK, Toussaint L, Moussawi M, Roberts B, Saligrama N, Brossay L, Huber SA,  
472 Teuscher C. 2012. Chromosome y regulates survival following murine Coxsackievirus b3  
473 infection. *G3 (Bethesda)* 2:115-21.
- 474 33. Bopegamage S, Kovacova J, Vargova A, Motusova J, Petrovicova A, Benkovicova M,  
475 Gomolcak P, Bakkers J, van Kuppeveld F, Melchers WJ, Galama JM. 2005. Coxsackie B

- 476 virus infection of mice: inoculation by the oral route protects the pancreas from  
477 damage, but not from infection. *J Gen Virol* 86:3271-80.
- 478 34. Bopegamage S, Borsanyiova M, Vargova A, Petrovicova A, Benkovicova M, Gomolcak P.  
479 2003. Coxsackievirus infection of mice. I. Viral kinetics and histopathological changes in  
480 mice experimentally infected with coxsackieviruses B3 and B4 by oral route. *Acta Virol*  
481 47:245-51.
- 482 35. Harrath R, Bourlet T, Delezay O, Douche-Aourik F, Omar S, Aouni M, Pozzetto B. 2004.  
483 Coxsackievirus B3 replication and persistence in intestinal cells from mice infected orally  
484 and in the human CaCo-2 cell line. *J Med Virol* 74:283-90.
- 485 36. Loria RM, Kibrick S, Broitman SA. 1974. Peroral infection with group B coxsackievirus in  
486 the adult mouse: protective functions of the gut. *J Infect Dis* 130:539-43.
- 487 37. Loria RM, Kibrick S, Broitman SA. 1974. Peroral infection with group B coxsackievirus in  
488 the newborn mouse: a model for human infection. *J Infect Dis* 130:225-230.
- 489 38. Robinson CM, Wang Y, Pfeiffer JK. 2017. Sex-Dependent Intestinal Replication of an  
490 Enteric Virus. *J Virol* 91.
- 491 39. Huber SA, Job LP, Woodruff JF. 1981. Sex-related differences in the pattern of  
492 Coxsackievirus B-3-induced immune spleen cell cytotoxicity against virus-infected  
493 myofibers. *Infect Immun* 32:68-73.
- 494 40. Estrin M, Huber SA. 1987. Coxsackievirus B3-induced myocarditis. Autoimmunity is  
495 L3T4+ T helper cell and IL-2 independent in BALB/c mice. *Am J Pathol* 127:335-41.
- 496 41. Henke A, Huber S, Stelzner A, Whitton JL. 1995. The role of CD8+ T lymphocytes in  
497 Coxsackievirus B3-induced myocarditis. *J Virol* 69:6720-8.
- 498 42. Frisancho-Kiss S, Davis SE, Nyland JF, Frisancho JA, Cihakova D, Barrett MA, Rose NR,  
499 Fairweather D. 2007. Cutting edge: cross-regulation by TLR4 and T cell Ig mucin-3  
500 determines sex differences in inflammatory heart disease. *J Immunol* 178:6710-4.
- 501 43. Fairweather D, Rose NR. 2007. Coxsackievirus-induced myocarditis in mice: a model of  
502 autoimmune disease for studying immunotoxicity. *Methods* 41:118-22.
- 503 44. Trigunaite A, Dimo J, Jørgensen TN. 2015. Suppressive effects of androgens on the  
504 immune system. *Cellular Immunology* 294:87-94.
- 505 45. Araneo BA, Dowell T, Diegel M, Daynes RA. 1991. Dihydrotestosterone exerts a  
506 depressive influence on the production of interleukin-4 (IL-4), IL-5, and gamma-  
507 interferon, but not IL-2 by activated murine T cells. *Blood* 78:688-99.
- 508 46. Frisancho-Kiss S, Nyland JF, Davis SE, Frisancho JA, Barrett MA, Rose NR, Fairweather D.  
509 2006. Sex differences in Coxsackievirus B3-induced myocarditis: IL-12Rbeta1 signaling  
510 and IFN-gamma increase inflammation in males independent from STAT4. *Brain Res*  
511 1126:139-47.
- 512 47. Kadel S, Kovats S. 2018. Sex Hormones Regulate Innate Immune Cells and Promote Sex  
513 Differences in Respiratory Virus Infection. *Frontiers in Immunology* 9.
- 514 48. Robinson CM, Woods Acevedo MA, McCune BT, Pfeiffer JK. 2019. Related Enteric  
515 Viruses Have Different Requirements for Host Microbiota in Mice. *J Virol* 93.
- 516 49. Kuss SK, Best GT, Etheredge CA, Puijssers AJ, Frierson JM, Hooper LV, Dermody TS,  
517 Pfeiffer JK. 2011. Intestinal microbiota promote enteric virus replication and systemic  
518 pathogenesis. *Science* 334:249-52.

- 519 50. Baldrige MT, Nice TJ, McCune BT, Yokoyama CC, Kambal A, Wheadon M, Diamond MS,  
520 Ivanova Y, Artyomov M, Virgin HW. 2015. Commensal microbes and interferon-lambda  
521 determine persistence of enteric murine norovirus infection. *Science* 347:266-9.
- 522 51. Dhalech AH, Fuller TD, Robinson CM. 2021. Specific Bacterial Cell Wall Components  
523 Influence the Stability of Coxsackievirus B3. *J Virol* 95:e0142421.
- 524 52. Robinson CM, Jesudhasan PR, Pfeiffer JK. 2014. Bacterial lipopolysaccharide binding  
525 enhances virion stability and promotes environmental fitness of an enteric virus. *Cell*  
526 *Host Microbe* 15:36-46.
- 527 53. Markle JG, Frank DN, Mortin-Toth S, Robertson CE, Feazel LM, Rolle-Kampczyk U, von  
528 Bergen M, McCoy KD, Macpherson AJ, Danska JS. 2013. Sex differences in the gut  
529 microbiome drive hormone-dependent regulation of autoimmunity. *Science* 339:1084-  
530 8.
- 531 54. Yurkovetskiy L, Burrows M, Khan AA, Graham L, Volchkov P, Becker L, Antonopoulos D,  
532 Umesaki Y, Chervonsky AV. 2013. Gender bias in autoimmunity is influenced by  
533 microbiota. *Immunity* 39:400-12.
- 534 55. Kornman KS, Loesche WJ. 1982. Effects of estradiol and progesterone on *Bacteroides*  
535 *melaninogenicus* and *Bacteroides gingivalis*. *Infect Immun* 35:256-63.
- 536 56. Liu JY, Wang SM, Chen IC, Yu CK, Liu CC. 2013. Hepatic damage caused by coxsackievirus  
537 B3 is dependent on age-related tissue tropisms associated with the coxsackievirus-  
538 adenovirus receptor. *Pathog Dis* 68:52-60.
- 539 57. Koestner W, Spanier J, Klause T, Tegtmeier PK, Becker J, Herder V, Borst K, Todt D,  
540 Lienenklaus S, Gerhauser I, Detje CN, Geffers R, Langereis MA, Vondran FWR, Yuan Q,  
541 van Kuppeveld FJM, Ott M, Staeheli P, Steinmann E, Baumgartner W, Wacker F, Kalinke  
542 U. 2018. Interferon-beta expression and type I interferon receptor signaling of  
543 hepatocytes prevent hepatic necrosis and virus dissemination in Coxsackievirus B3-  
544 infected mice. *PLoS Pathog* 14:e1007235.
- 545 58. Alirezai M, Flynn CT, Wood MR, Whitton JL. 2012. Pancreatic acinar cell-specific  
546 autophagy disruption reduces coxsackievirus replication and pathogenesis in vivo. *Cell*  
547 *Host Microbe* 11:298-305.
- 548 59. Lasrado N, Gangapara A, Massilamany C, Arumugam R, Shelbourn A, Rasquinha MT,  
549 Basavalingappa RH, Delhon G, Xiang SH, Pattnaik AK, Steffen D, Reddy J. 2021.  
550 Attenuated strain of CVB3 with a mutation in the CAR-interacting region protects  
551 against both myocarditis and pancreatitis. *Sci Rep* 11:12432.
- 552 60. Rhoades RE, Tabor-Godwin JM, Tsueng G, Feuer R. 2011. Enterovirus infections of the  
553 central nervous system. *Virology* 411:288-305.
- 554 61. Sin J, Mangale V, Thienphrapa W, Gottlieb RA, Feuer R. 2015. Recent progress in  
555 understanding coxsackievirus replication, dissemination, and pathogenesis. *Virology*  
556 484:288-304.
- 557 62. Ida-Hosonuma M, Iwasaki T, Yoshikawa T, Nagata N, Sato Y, Sata T, Yoneyama M, Fujita  
558 T, Taya C, Yonekawa H, Koike S. 2005. The alpha/beta interferon response controls  
559 tissue tropism and pathogenicity of poliovirus. *J Virol* 79:4460-9.

562 **Figure Legends**

563 **Figure 1.** CVB3-induced lethality is enhanced by testosterone. (A) Serum testosterone  
564 concentrations in mock or castrated male C57BL/6 *Ifnar*<sup>-/-</sup> provided either placebo or  
565 testosterone capsules. \*\*p<0.01, one-way ANOVA. (B) Survival of mock castrated + placebo,  
566 castrated + placebo, and castrated + testosterone mice after oral inoculation with 5x10<sup>7</sup> PFU of  
567 CVB3-Nancy. n=8-9 mice per group. \*\*p<0.01, \*\*\*p<0.001, Log-rank test. (C) Survival of male  
568 *Ifnar*<sup>-/-</sup> mice treated with flutamide or vehicle control after oral inoculation with 5x10<sup>7</sup> PFU of  
569 CVB3-Nancy. n=8-9 mice per group. \*p<0.05 Log-rank test.

570

571 **Figure 2.** CVB3 fecal shedding and tissue titers following oral inoculation. Mice were orally  
572 inoculated with 5x10<sup>7</sup> PFU of CVB3-Nancy. (A) CVB3-Nancy fecal titers in mock castrated,  
573 castrated + placebo, and castrated + mice. (B) CVB3-Nancy fecal titers in mock castrated,  
574 castrated + placebo, and castrated + mice at days 2 and 3 post-inoculation. \*p<0.05, \*\*p<0.01,  
575 Kruskal-Wallis test. (C) CVB3-Nancy tissue titers. Mice were euthanized at 3 dpi, and tissues  
576 were collected in mock castrated (blue), castrated + placebo (gray), and castrated + testosterone  
577 (blue and gray) *Ifnar*<sup>-/-</sup> mice.

578

579 **Figure 3.** The inflammatory response to CVB3 is enhanced in mice with testosterone. Serum  
580 cytokine quantification in uninfected, mock castrated, castrated + placebo, and castrated +  
581 testosterone *Ifnar*<sup>-/-</sup> mice. Infected mice were orally inoculated with 5x10<sup>7</sup> PFUs of CVB3-  
582 Nancy, and serum was collected 3 dpi.

583

584 **Figure 4.** Oral inoculation of *Ifnar*<sup>-/-</sup> mice with CVB3-Nancy does not induce liver damage or  
585 cause pancreatitis. Serum levels of (A) ALT and (B) pancreatic lipase were quantified by ELISA  
586 at 3 dpi. One-way ANOVA. H&E stained (C) liver and (D) pancreas collected at 3 dpi following  
587 oral inoculation of mock castrated, castrated + placebo, and castrated + testosterone male *Ifnar*<sup>-/-</sup>  
588 mice. Histology is representative of two experiments and at least 4 mice per group.

589

590 **Figure 5.** Testosterone promotes CVB3 shedding and dissemination in female *Ifnar*<sup>-/-</sup> mice, but  
591 not lethality. (A) Serum testosterone concentrations in female C57BL/6 *Ifnar*<sup>-/-</sup> provided either  
592 placebo or testosterone capsules. (B) Survival of female C57BL/6 *Ifnar*<sup>-/-</sup> provided either placebo  
593 or testosterone capsules after oral inoculation with 5x10<sup>7</sup> PFU of CVB3-Nancy. (C) CVB3-  
594 Nancy fecal titers in female C57BL/6 *Ifnar*<sup>-/-</sup> provided either placebo or testosterone. \*p<0.05,  
595 Mann-Whitney test. (D) CVB3-Nancy tissue titers in female C57BL/6 *Ifnar*<sup>-/-</sup> provided either  
596 placebo or testosterone. \*p<0.05, \*\*p<0.01, Mann-Whitney test.

597

598

# Figure 1

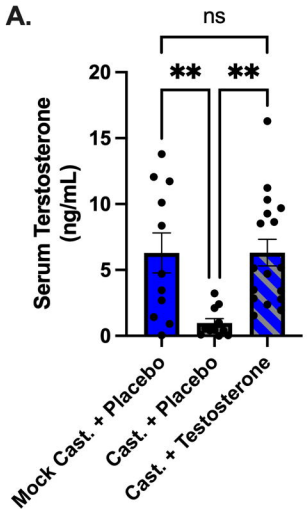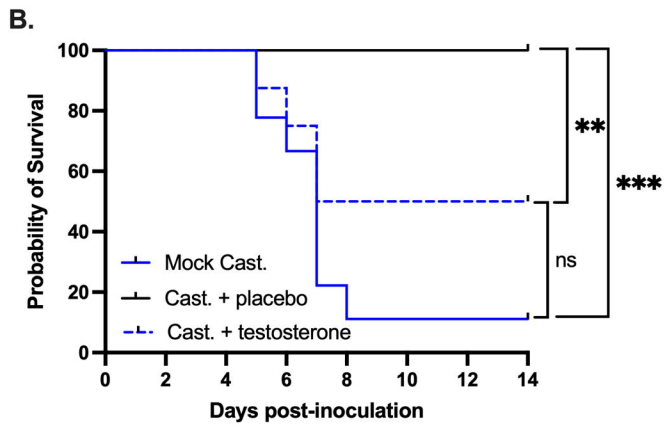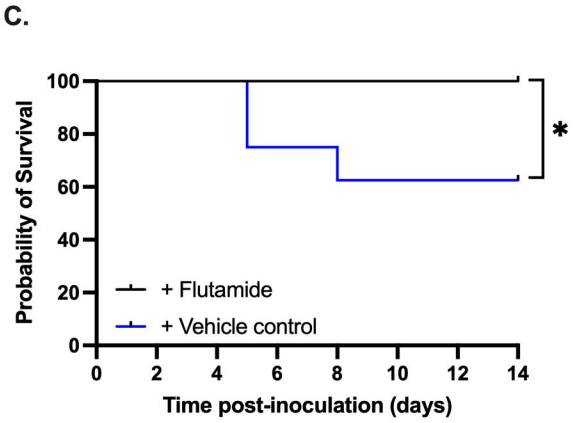



# Figure 2

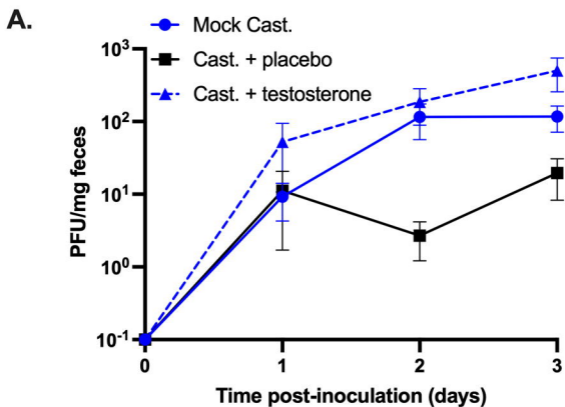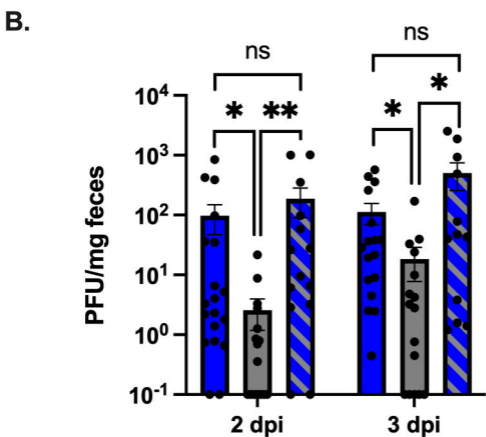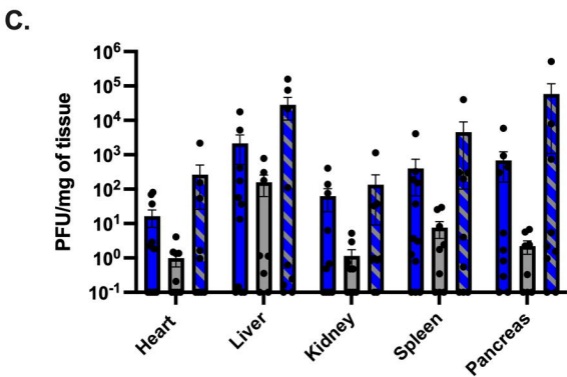

# Figure 3

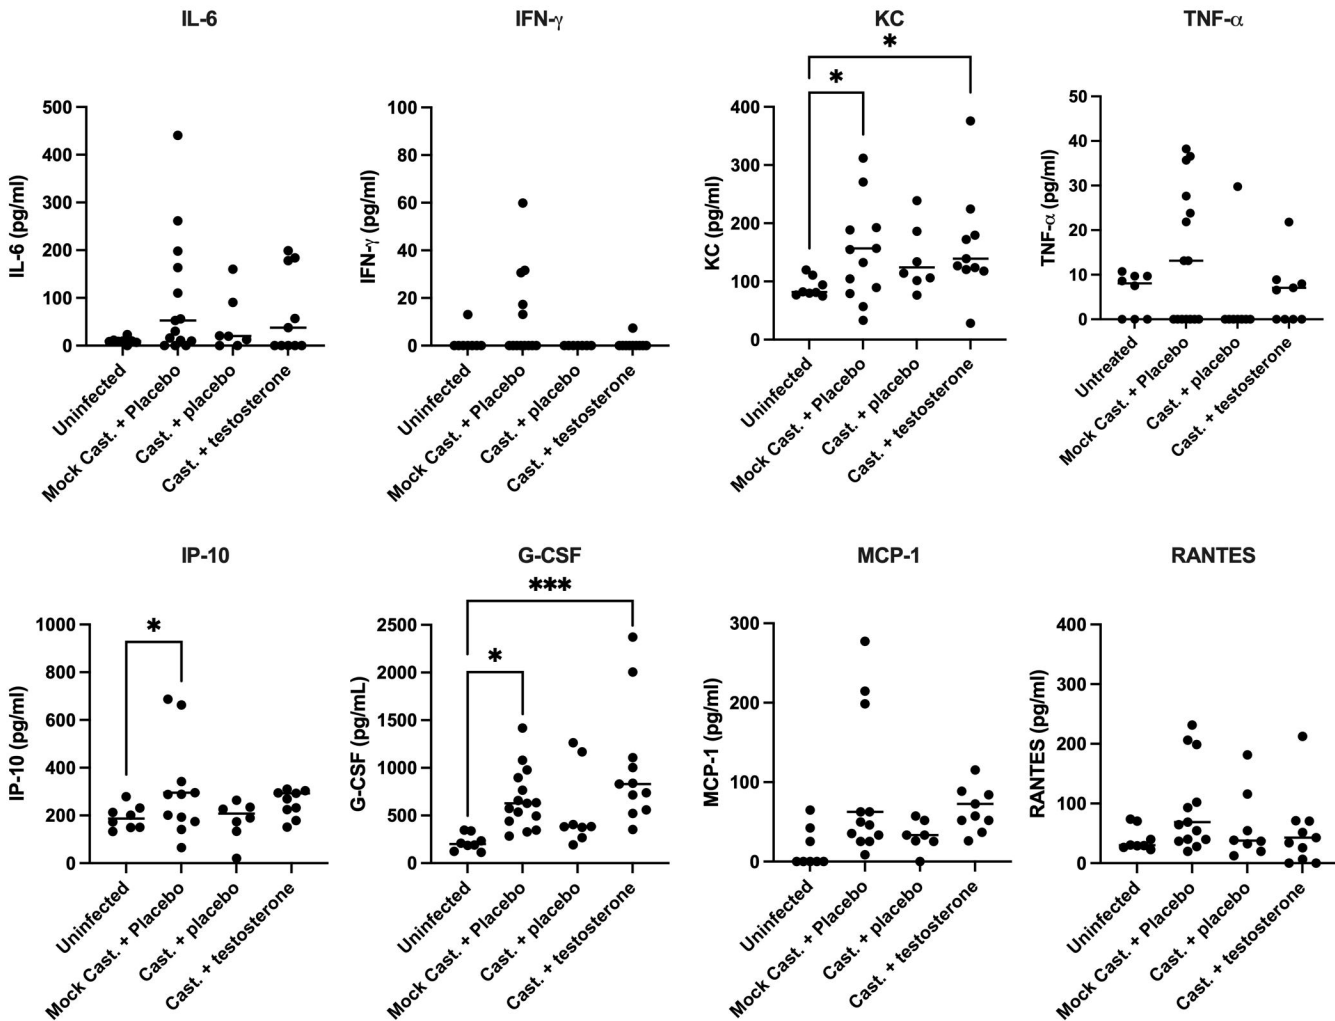

# Figure 4

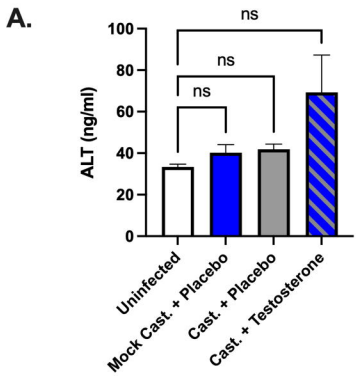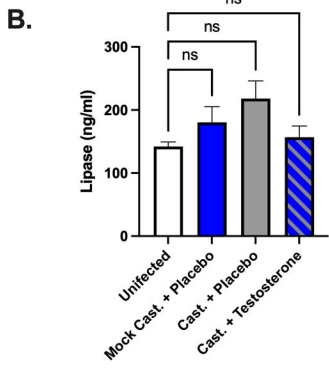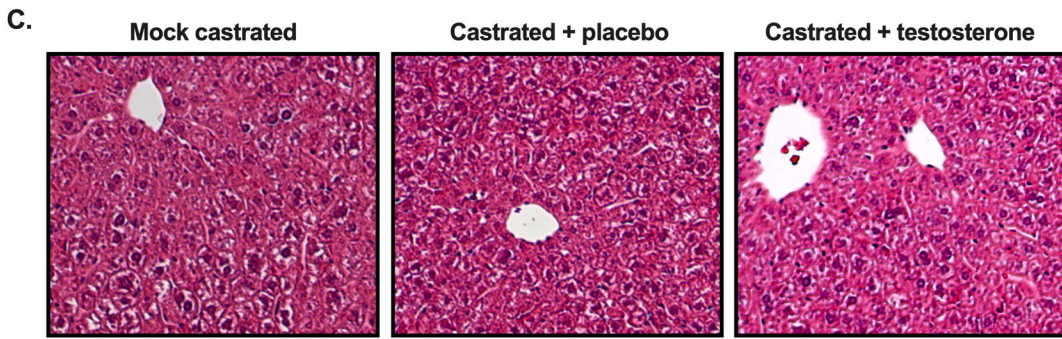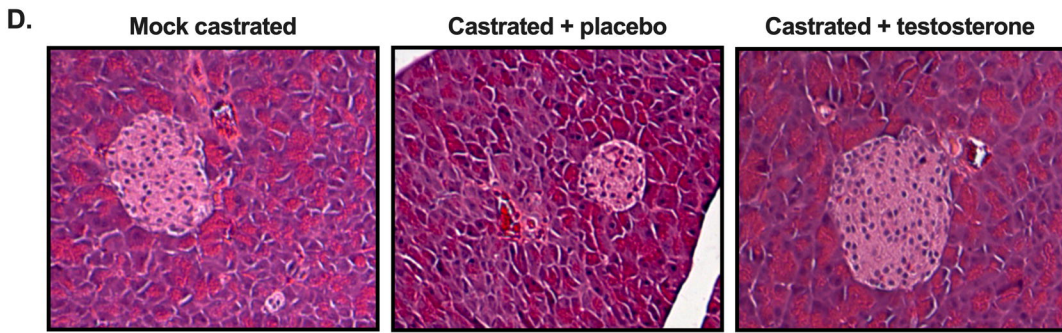

# Figure 5

A.

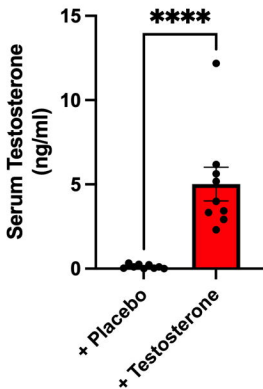

B.

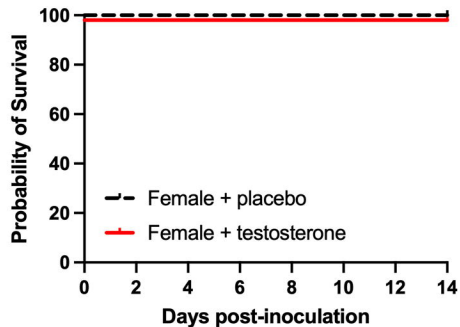

C.

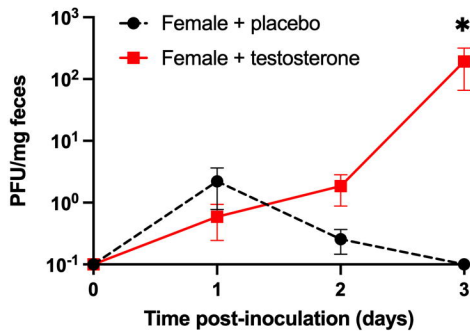

D.

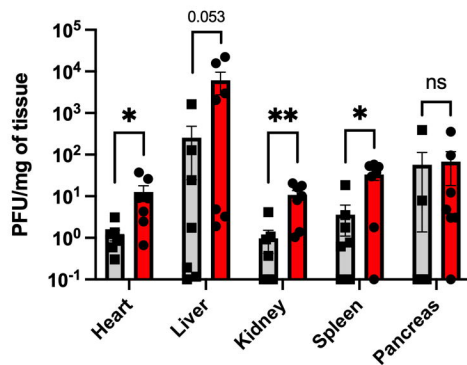

Source: http://biorxiv.org/content/10.1101/2021.12.08.471774v1.full.pdf
